# Supplementary material
Source: publisher figshare collection journal article supplement (https://acs.figshare.com/ndownloader/files/8975152)
Supplement: Supplementary file 1 [file 8975152]

**Supporting Information for**  
**CO Poisoning and CO Hydrogenation on the Surface of Pd Hydrogen Separation**  
**Membranes**

Casey P. O'Brien, Ivan C. Lee\*

*U.S. Army Research Laboratory, Sensors and Electron Devices Directorate, 2800 Powder Mill  
Road, Adelphi, MD 20783, USA*

\*Corresponding author. E-mail address: [ivan.c.lee2.civ@mail.mil](mailto:ivan.c.lee2.civ@mail.mil)

## **Table of Contents**

|                                                                                                    |    |
|----------------------------------------------------------------------------------------------------|----|
| <b>S.1. Deactivation of Pd from Ni(CO)<sub>4</sub> impurities</b>                                  |    |
| .....                                                                                              | S3 |
| <b>S.2. Surface IRAS spectra collected during H<sub>2</sub>/CO exposure in the 373-533 K range</b> |    |
| .....                                                                                              | S4 |

### S.1. Deactivation of Pd from $\text{Ni}(\text{CO})_4$ impurities

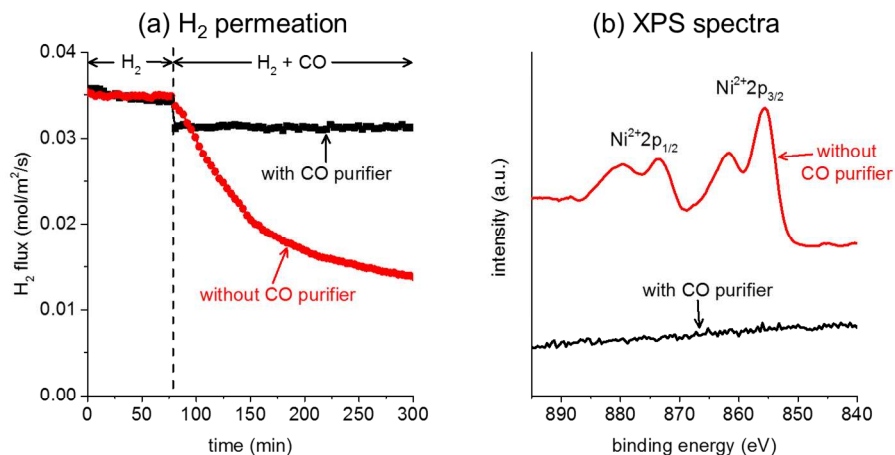

**Figure S1.** (a)  $\text{H}_2$  flux across a 25  $\mu\text{m}$ -thick Pd membrane during exposure to 50%  $\text{H}_2$  in  $\text{N}_2$  at 513 K during the first 80 minutes of the reaction, and then during exposure to a 5%CO/50% $\text{H}_2$ / $\text{N}_2$  gas mixture with a CO purifier (black) and without a CO purifier (red). (b) X-ray photoelectron (XPS) spectra of the Pd membrane surfaces following 300 minutes exposure to a 5%CO/50% $\text{H}_2$ / $\text{N}_2$  gas mixture with a CO purifier (black) and without a CO purifier (red) at 513 K. Transient deactivation of the membrane without the CO purifier (a) is due to the accumulation of Ni deposits on the membrane surface (b) from  $\text{Ni}(\text{CO})_4$  impurities in the CO gas bottle, which can be effectively removed by installing a CO gas purifier.

## S.2. Surface IRAS spectra collected during H<sub>2</sub>/CO exposure in the 373-533 K range

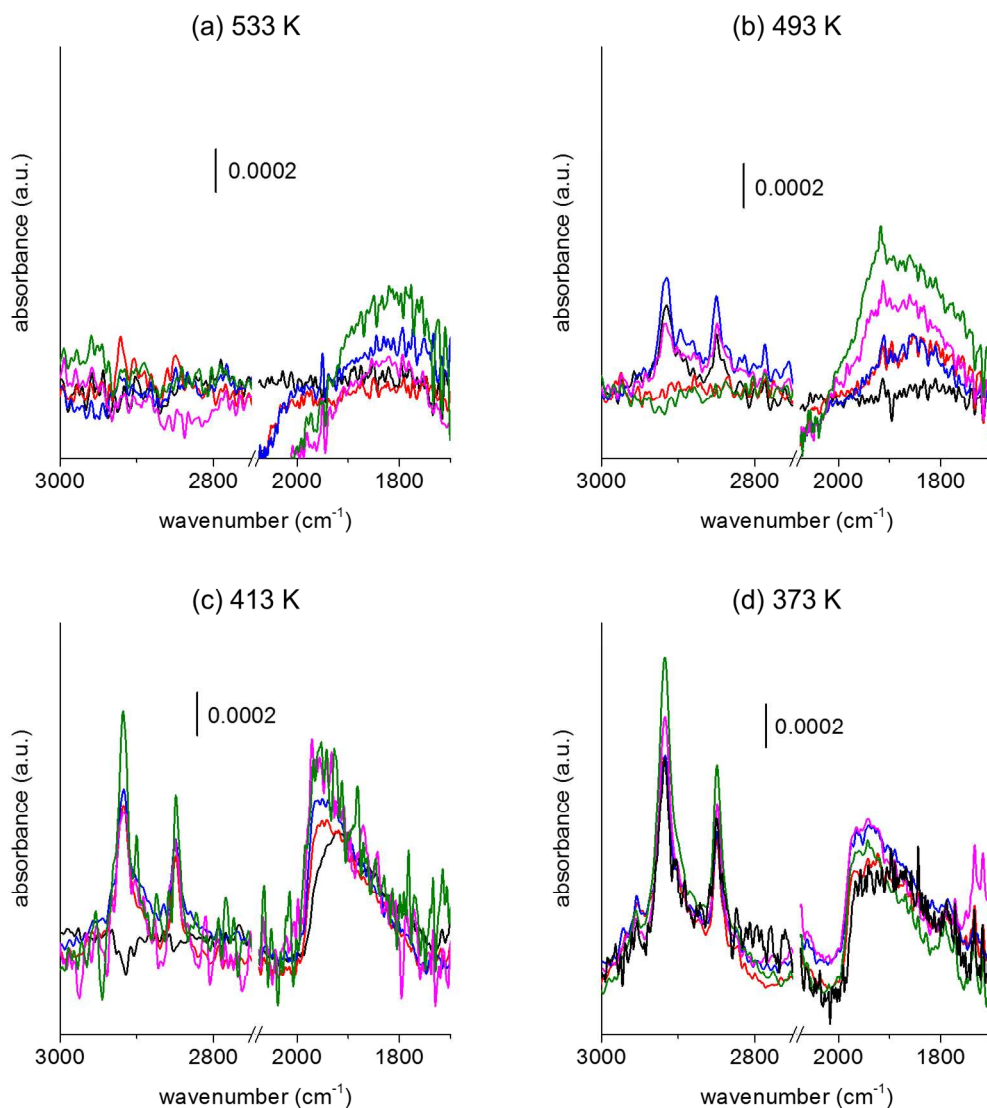

**Figure S2.** IRAS spectra collected during exposure of a 25- $\mu$ m-thick Pd foil membrane to 50% H<sub>2</sub> and 0.05% CO (black), 0.5% CO (red), 1% CO (blue), 3% CO (magenta), and 5% CO (olive) at (a) 533 K, (b) 493 K, (c) 413 K, and (d) 373 K. IRAS spectra were recorded while the H<sub>2</sub> fluxes in Figure 3 were measured simultaneously.
